# Supplementary material for: A Novel Clinical Perspective on New Masses after Lead Extraction (Ghosts) by Means of Intracardiac Echocardiography
Source: PubMed Central journal article supplement (PMC7465795; doi:10.3390/jcm9082571), 2020-08-08
Supplement: jcm-09-02571-s001.pdf [file jcm-09-02571-s001.pdf]

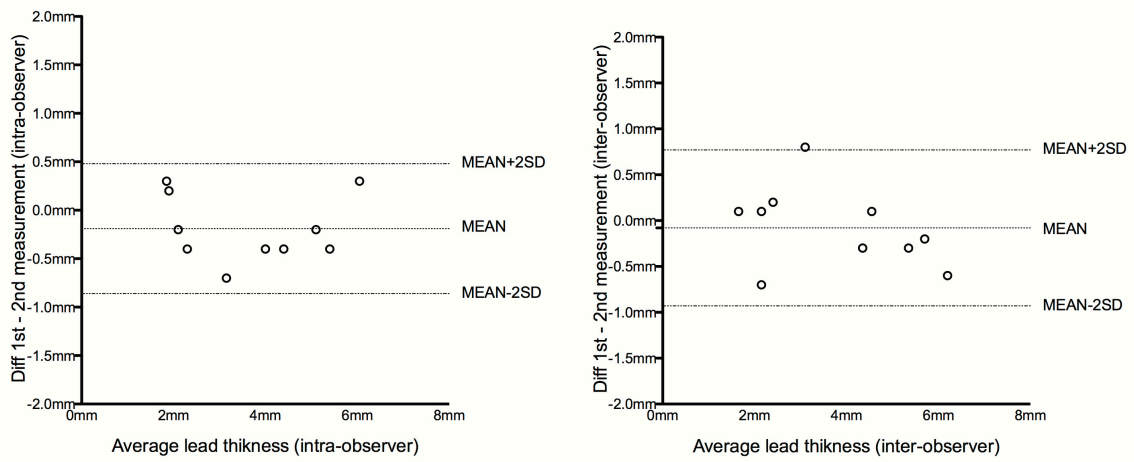

**Supplemental Figure 1.** Intra and inter observer variability of lead thickness measurement. The limits of agreement are narrow for both the intra and inter-observer graph (within 1 mm) yielding a coefficient of repeatability from duplicate measurement at 0.74 mm and 0.77 mm respectively.

## **VIDEO LEGENDS.**

Video 1. Linked to Figure 1. See Figure 1 for explanation.

Video 2. Linked to Figure 3. See Figure 3 for explanation.

Video 3. Linked to Figure 5. See Figure 5 for explanation.
